# Supplementary material for: Characterization of nitrous acid and its potential effects on secondary pollution in the warm season in Beijing urban areas
Source: Copernicus journal article supplement (doi:10.5194/acp-25-2551-2025), 2025-02-27
Supplement: Supplementary file 1 [file acp-25-2551-2025-supplement.pdf]

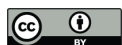

*Supplement of*

## **Characterization of nitrous acid and its potential effects on secondary pollution in the warm season in Beijing urban areas**

**Junling Li et al.**

*Correspondence to:* Hong Li (lihong@craes.org.cn), Jian Gao (gaojian@craes.org.cn), and Maofa Ge (gemaofa@iccas.ac.cn)

The copyright of individual parts of the supplement might differ from the article licence.

5

Ozone photolysis ( $P_{\text{OH-O}_3}$ ) was also one production pathway of OH radical, and this was calculated and compared to  $P_{\text{OH-HONO}}$ .

$$P_{\text{OH-HONO}} = J(\text{HONO})[\text{HONO}] \quad (\text{S1})$$

10

$$P_{\text{OH-O}_3} = 2J(\text{O}^1\text{D})[\text{O}_3]\Phi_{\text{OH}} \quad (\text{S2})$$

$$\Phi_{\text{OH}} = \frac{k_{\text{O}^1\text{D}+\text{H}_2\text{O}}[\text{H}_2\text{O}]}{k_{\text{O}^1\text{D}+\text{H}_2\text{O}}[\text{H}_2\text{O}] + k_{\text{O}^1\text{D}+\text{O}_2}[\text{O}_2] + k_{\text{O}^1\text{D}+\text{N}_2}[\text{N}_2]} \quad (\text{S3})$$

$$[\text{H}_2\text{O}] = \text{RH} \times \frac{P_{\text{H}_2\text{O}}}{P} \times N_{\text{air}} \quad (\text{S4})$$

$$P_{\text{H}_2\text{O}} = 1013.25 \times \text{EXP} \left[ 13.3185 \times \left( 1 - \frac{375.15}{273.15+T} \right) - 1.97 \times \left( 1 - \frac{375.15}{273.15+T} \right)^2 - 0.6445 \times \left( 1 - \frac{375.15}{273.15+T} \right)^3 - 0.1299 \times \left( 1 - \frac{375.15}{273.15+T} \right)^4 \right] \quad (\text{S5})$$

$$[\text{O}_2] = 0.20946 \times N_{\text{air}} \quad (\text{S6})$$

15

$$[\text{N}_2] = 0.78084 \times N_{\text{air}} \quad (\text{S7})$$

$$N_{\text{air}} = \frac{P \times N_A}{R \times (273.15+T)} \quad (\text{S8})$$

where  $[\ ]$  were the concentration of the substances,  $\Phi$  was the OH radical yield in the  $\text{O}^1\text{D}$  reaction pathway,  $k_{\text{O}^1\text{D}+\text{H}_2\text{O}}$  was  $2.2 \times 10^{-10} \text{ cm}^3 \text{ mole}^{-1} \text{ s}^{-1}$ ,  $k_{\text{O}^1\text{D}+\text{O}_2}$  was  $4.0 \times 10^{-11} \text{ cm}^3 \text{ mole}^{-1} \text{ s}^{-1}$ ,  $k_{\text{O}^1\text{D}+\text{N}_2}$  was  $2.6 \times 10^{-11} \text{ cm}^3 \text{ mole}^{-1} \text{ s}^{-1}$  (Atkinson et al., 1997),  $P$  was the atmospheric pressure,  $P_{\text{H}_2\text{O}}$  was the partial pressure of water vapor (Seinfeld and Pandis, 2006),  $N_{\text{air}}$  was the number of molecules of air per unit volume,  $N_A$  was  $6.022 \times 10^{23} \text{ mole}^{-1} \text{ mol}^{-1}$ , and  $R$  was  $8.314 \text{ J mol}^{-1} \text{ K}^{-1}$ .

20

**Table S1. The average and monthly average value of T, RH, WS.**

| Meteorological Parameters | T (°C)    | RH (%) | WS (m/sec) |      |
|---------------------------|-----------|--------|------------|------|
| average                   | 23        | 56     | 1.2        |      |
| monthly average           | June      | 28     | 34         | 1.7  |
|                           | July      | 27     | 71         | 1.2  |
|                           | August    | 26     | 59         | 1.2  |
|                           | September | 22     | 65         | 1.0  |
|                           | October   | 13     | 50         | 0.94 |

**Table S2. Overview on HONO field observations performed in Beijing since 2000.**

| Date                                                                                                                                                                                                    | Site Property                                                                                                          | HONO (ppbV)                                                              |                                                                                                | HONO/NO <sub>2</sub>                                               | Emission Factor | Reference               |
|---------------------------------------------------------------------------------------------------------------------------------------------------------------------------------------------------------|------------------------------------------------------------------------------------------------------------------------|--------------------------------------------------------------------------|------------------------------------------------------------------------------------------------|--------------------------------------------------------------------|-----------------|-------------------------|
| May 16 <sup>th</sup> -25 <sup>th</sup> , 2000<br>Jun. 24 <sup>th</sup> - Jul. 4 <sup>th</sup> , 2000<br>Sep. 7 <sup>th</sup> -11 <sup>th</sup> , 2000<br>Dec. 18 <sup>th</sup> -28 <sup>th</sup> , 2000 | Urban site<br>(Peking University)<br>39.54°N, 116.23°E                                                                 | (mean)<br>1.8<br>1.6<br>1.4<br>1.5                                       | (min-max)<br>1.1-3.1<br>0.9-2.1<br>1.1-1.5<br>0.8-2.6                                          | -                                                                  | ---             | (Hu et al., 2002)       |
| Jul.-Aug., 2002<br>Jul.-Aug., 2003                                                                                                                                                                      | Urban site<br>(Peking University)<br>39.54°N, 116.23°E                                                                 | (mean)<br>1.9                                                            | (standard deviation)<br>1.3                                                                    | -                                                                  | -               | (Wu et al., 2009)       |
| Jan. 23 <sup>rd</sup> -Feb. 14 <sup>th</sup> , 2007<br>Aug. 2 <sup>nd</sup> -Aug. 31 <sup>st</sup> , 2007                                                                                               | Urban site<br>(Peking University)<br>39.99°N, 116.28°E                                                                 | (mean)<br>1.0<br>1.5                                                     | (min-max)<br>0.30-2.7<br>0.44-2.9                                                              | 0.03<br>0.05                                                       | 0.0065          | (Spataro et al., 2013)  |
| Jul. 2008-Apr. 2009                                                                                                                                                                                     | Urban site<br>(Institute of Atmospheric<br>Physics of the Chinese Academy of<br>Sciences, IAPCAS)<br>39.98°N, 116.38°E | (mean)<br>0.19 (Spring)<br>0.18 (Summer)<br>0.46 (Fall)<br>0.48 (Winter) | (10 <sup>th</sup> -90 <sup>th</sup> perc.)<br>0.04-0.45<br>0.01-0.40<br>0.05-1.14<br>0.04-1.04 | 0.015 (Spring)<br>0.008 (Summer)<br>0.020 (Fall)<br>0.015 (Winter) | -               | (Hendrick et al., 2014) |
| Oct. 28 <sup>th</sup> -Nov. 3 <sup>rd</sup> , 2014                                                                                                                                                      | Urban site<br>(Institute of Chemistry, Chinese<br>Academy of Sciences, ICCAS)<br>39.99°N, 116.32°E                     | (mean)<br>1.45                                                           | (min-max)<br>0.54-2.77                                                                         | 0.039                                                              | 0.0065          | (Tong et al., 2015)     |

|                                                                                                                                                                                                           |                                                                                                                    |                                                                         |                                                          |                                                          |               |                       |
|-----------------------------------------------------------------------------------------------------------------------------------------------------------------------------------------------------------|--------------------------------------------------------------------------------------------------------------------|-------------------------------------------------------------------------|----------------------------------------------------------|----------------------------------------------------------|---------------|-----------------------|
|                                                                                                                                                                                                           | Suburban Site<br>(Lake yanqi campus of University of Chinese Academy of Sciences, UCAS)<br>40.4°N, 116.6°E         | (mean)<br>0.74                                                          | (min-max)<br>0.18-1.23                                   | 0.088                                                    |               |                       |
| Feb.22 <sup>nd</sup> -Mar.2 <sup>nd</sup> , 2014                                                                                                                                                          | Urban site<br>(ICCAS) 39.99°N,116.32°E                                                                             | -                                                                       | (min-max)<br>0.28-0.34                                   | -                                                        | 0.0065        | (Hou et al., 2016)    |
| Dec. 12 <sup>th</sup> -Dec.22 <sup>nd</sup> , 2015                                                                                                                                                        | Urban site<br>(ICCAS) 39.99°N,116.32°E                                                                             | (mean)<br>0.86                                                          | -                                                        | 0.052                                                    |               | (Tong et al., 2016)   |
|                                                                                                                                                                                                           | Suburban Site<br>(Lake yanqi campus of UCAS) 40.4°N, 116.6°E                                                       | (mean)<br>0.52                                                          | -                                                        | 0.08                                                     |               |                       |
| Sep.22 <sup>nd</sup> -Oct.21 <sup>th</sup> ,2015<br>Jan.3 <sup>rd</sup> -Jan.27 <sup>th</sup> ,2016<br>Apr.1 <sup>st</sup> -May14 <sup>th</sup> ,2016<br>Jun.20 <sup>th</sup> -Jul.25 <sup>th</sup> ,2016 | Urban site<br>(Research Center for Eco-Environmental Sciences, Chinese Academy of Sciences)<br>40.0078°N, 116.33°E | (mean)<br>2.3 (Fall)<br>1.1 (Winter)<br>1.1 (Spring)<br>1.4 (Summer)    | (standard deviation)<br>1.8<br>0.89<br>0.95<br>0.90      | 0.070±0.033<br>0.046±0.024<br>0.041±0.023<br>0.079±0.014 | -             | (Wang et al., 2017)   |
| Dec. 16 <sup>th</sup> -23 <sup>nd</sup> , 2016                                                                                                                                                            | Urban site<br>(ICCAS) 39.99°N,116.32°E                                                                             | (mean)<br>3.5                                                           | (min-max)<br>0.3-11                                      | -                                                        | 0.013         | (Zhang et al., 2019)  |
| Apr. 14 <sup>th</sup> -28 <sup>th</sup> , 2017                                                                                                                                                            | Urban site<br>(ICCAS) 39.99°N,116.32°E                                                                             | (mean)<br>1.2                                                           | (min-max)<br>0.02-6.4                                    | -                                                        | 0.008         | (Lin et al., 2022)    |
| Dec. 15 <sup>th</sup> ,2017-Jan. 4 <sup>th</sup> , 2018                                                                                                                                                   | Urban site<br>(ICCAS) 39.99°N,116.32°E                                                                             | (mean)<br>1.2                                                           | (standard deviation)<br>1.2                              | -                                                        | 0.0051-0.0081 | (Zhang et al., 2022a) |
| May 7 <sup>th</sup> -30 <sup>th</sup> , 2017<br>Jan. 15 <sup>th</sup> -30 <sup>th</sup> , 2018                                                                                                            | Urban site<br>(Chinese Research Academy of Environmental Sciences)<br>(CRAES) 40°04'N, 116°42'E                    | (mean)<br>1.3 (Summer)<br>1.0 (Winter)                                  | (standard deviation)<br>(max)<br>0.94 (6.7)<br>1.3 (9.6) | 0.072±0.052 (Summer)<br>0.041±0.026 (Winter)             | 0.008         | (Gu et al., 2022)     |
| Apr.-May, 2016<br>Jul.-Aug., 2017<br>Oct.-Nov., 2017<br>Dec. 2017- Feb., 2018                                                                                                                             | Urban site<br>the Institute of Urban Meteorological<br>39°56'N,116°17'E                                            | (mean)<br>1.7 (Spring)<br>1.8 (Summer)<br>2.2 (Autumn)<br>0.89 (Winter) | -                                                        | -                                                        | -             | (Su et al., 2021)     |
| Aug. 18 <sup>th</sup> -Sep. 16 <sup>th</sup> , 2018                                                                                                                                                       | Suburban Site<br>Qingyuan campus of Beijing Institute of Petrochemical Technology (BIPT)                           | (mean)<br>0.38                                                          | (min-max)<br>(standard deviation)<br>0.01-1.9 (0.35)     | -                                                        | 0.0085        | (Xuan et al., 2023)   |

|                                                                                                                                                                                                                                                         |                                                                                                  |                                                                                          |                                                                          |                                                             |                    |                       |
|---------------------------------------------------------------------------------------------------------------------------------------------------------------------------------------------------------------------------------------------------------|--------------------------------------------------------------------------------------------------|------------------------------------------------------------------------------------------|--------------------------------------------------------------------------|-------------------------------------------------------------|--------------------|-----------------------|
| Oct. 25 <sup>th</sup> -Dec. 7 <sup>th</sup> ,<br>2018                                                                                                                                                                                                   | Urban site<br>(ICCAS) 39.99°N,116.32°E<br>IAPCAS<br>39.98°N,116.38°E                             | (mean)<br>2.5                                                                            | (standard deviation)<br>1.6                                              |                                                             | 0.0097             | (Zhang et al., 2023b) |
| May 25 <sup>th</sup> -Jul.15 <sup>th</sup> ,<br>2018<br>Nov. 26 <sup>th</sup> , 2018-Jan.<br>15 <sup>th</sup> , 2019                                                                                                                                    | IAPCAS<br>39.98°N,116.38°E                                                                       | (mean)<br>1.3 (Summer)<br>1.1 (Winter)                                                   | (min-max)<br>(standard deviation)<br>0.53-2.4 (0.44)<br>0.02-3.2 (0.68)  | 6.8±1.4% (Summer)<br>5.1±2.7% (Winter)                      | 0.0078             | (Liu et al., 2021)    |
| Dec. 22 <sup>nd</sup> , 2018-Jan.<br>23 <sup>rd</sup> , 2019                                                                                                                                                                                            | Urban site<br>(ICCAS) 39.99°N,116.32°E                                                           | (mean)<br>0.98                                                                           | (min-max) (standard<br>deviation)<br>0.01-4.8 (0.85)                     | -                                                           | 0.0051-0.0081      | (Zhang et al., 2022b) |
| Jun. 13 <sup>th</sup> -Jul.4 <sup>th</sup> , 2019                                                                                                                                                                                                       | Urban site<br>(CRAES) 40°04'N, 116°42'E                                                          | (mean)<br>0.44                                                                           | (min-max) (standard<br>deviation)<br>0.10-1.4 (0.24)                     | -                                                           | 0.003,0.0065,0.008 | (Li et al., 2021)     |
| Jan. 22 <sup>th</sup> -Feb. 28 <sup>th</sup> ,<br>2018;<br>Dec. 1 <sup>st</sup> , 2018-Feb.<br>28 <sup>th</sup> , 2019;<br>Dec. 1 <sup>st</sup> , 2019-Feb.<br>28 <sup>th</sup> , 2020;<br>Dec. 1 <sup>st</sup> , 2020-Feb.<br>28 <sup>th</sup> , 2021; | Urban site,<br>(West Campus of Beijing University of<br>Chemical Technology)<br>39.95°N,116.31°E | (mean)<br>0.66 (2018)<br>1.4 (2019)<br>0.95 (2020)<br>1.3 (2021)                         | -                                                                        | 0.038(2018)<br>0.052 (2019)<br>0.042 (2020)<br>0.067 (2021) | 0.0079             | (Lian et al., 2022)   |
| Oct. 1 <sup>st</sup> -Oct. 31 <sup>st</sup> ,2019                                                                                                                                                                                                       | Urban site<br>(ICCAS) 39.99°N,116.32°E                                                           | (mean)<br>0.99                                                                           | -                                                                        | -                                                           | -                  | (Jia et al., 2023)    |
| Mar. 1 <sup>st</sup> -30 <sup>th</sup> , 2021                                                                                                                                                                                                           | Urban site<br>(ICCAS) 39.99°N,116.32°E                                                           | (mean)<br>1.5                                                                            | (standard deviation)<br>1.1                                              | 0.07                                                        | 0.008              | (Zhang et al., 2023a) |
| Jun.18 <sup>th</sup> -Oct.25 <sup>th</sup> , 2021                                                                                                                                                                                                       | Urban site<br>(CRAES) 40°04'N, 116°42'E                                                          | (mean)<br>1.3 (June)<br>1.3 (July)<br>1.0 (August)<br>0.96 (September)<br>0.89 (October) | (min-max)<br>0.14-4.4<br>0.11-4.8<br>0.052-4.8<br>0.078-5.2<br>0.066-5.1 | 0.052                                                       | 0.017              | This work             |

25 **Table S3. The measured JNO<sub>2</sub>, estimated JO<sup>1</sup>D, JHONO, OH concentration, averaged production/loss rates and proportion of daytime (10:00-15:00 LT) HONO in each month during the observation period.**

| averaged value                                            | June                 | July                 | August               | September            | October               |
|-----------------------------------------------------------|----------------------|----------------------|----------------------|----------------------|-----------------------|
| J(NO <sub>2</sub> ) (s <sup>-1</sup> )                    | 4.0×10 <sup>-3</sup> | 3.4×10 <sup>-3</sup> | 3.8×10 <sup>-3</sup> | 3.0×10 <sup>-3</sup> | 2.8×10 <sup>-3</sup>  |
| J(O <sup>1</sup> D) (s <sup>-1</sup> )                    | 1.5×10 <sup>-5</sup> | 1.6×10 <sup>-5</sup> | 1.3×10 <sup>-5</sup> | 1.0×10 <sup>-5</sup> | 0.66×10 <sup>-5</sup> |
| J(HONO) (s <sup>-1</sup> )                                | 8.2×10 <sup>-4</sup> | 9.1×10 <sup>-4</sup> | 8.1×10 <sup>-4</sup> | 8.0×10 <sup>-4</sup> | 6.7×10 <sup>-4</sup>  |
| OH (mole/cm <sup>3</sup> )                                | 6.4×10 <sup>6</sup>  | 7.0×10 <sup>6</sup>  | 5.6×10 <sup>6</sup>  | 4.5×10 <sup>6</sup>  | 3.0×10 <sup>6</sup>   |
| L <sub>phot</sub> (ppb/hr)                                | 2.7                  | 3.1                  | 3.9                  | 2.4                  | 1.1                   |
| L <sub>dep</sub> (ppb/hr)                                 | 0.26                 | 0.27                 | 0.22                 | 0.26                 | 0.13                  |
| L <sub>OH+HONO</sub> (ppb/hr)                             | 0.13                 | 0.14                 | 0.15                 | 0.085                | 0.029                 |
| P <sub>OH+NO</sub> (ppb/hr)                               | 0.64                 | 1.5                  | 1.5                  | 0.81                 | 0.68                  |
| P <sub>emis</sub> (ppb/hr)                                | 0.17                 | 0.19                 | 0.16                 | 0.21                 | 0.33                  |
| P <sub>unknown</sub> (ppb/hr)                             | 2.3                  | 1.8                  | 2.7                  | 1.7                  | 0.29                  |
| P <sub>unknown</sub> /NO <sub>2</sub> (hr <sup>-1</sup> ) | 0.32                 | 0.4                  | 0.61                 | 0.25                 | 0.025                 |

30

35

40

**Table S4. Correlations of  $P_{\text{unknown}}$  against various parameters during the observation period.**

| Parameters                                                          | June<br>(N = 42) |         | July<br>(N = 82) |        | August<br>(N = 103) |        | Summer<br>(N= 227) |        | September<br>(N = 102) |       | October<br>(N = 64) |      | Autumn<br>(N= 166) |        |
|---------------------------------------------------------------------|------------------|---------|------------------|--------|---------------------|--------|--------------------|--------|------------------------|-------|---------------------|------|--------------------|--------|
|                                                                     | R                | P       | R                | P      | R                   | P      | R                  | P      | R                      | P     | R                   | P    | R                  | P      |
| NO <sub>2</sub>                                                     | <b>0.42</b>      | 0.0061  | <b>0.42</b>      | 1.0E-4 | <b>-0.3</b>         | 0.002  | <b>0.19</b>        | 0.0046 | -0.05                  | 0.62  | 0.08                | 0.53 | <b>-0.21</b>       | 0.0068 |
| JNO <sub>2</sub>                                                    | -0.18            | 0.50    | 0.038            | 0.074  | -0.076              | 0.63   | <b>-0.044</b>      | 0.026  | 0.21                   | 0.24  | -0.13               | 0.34 | <b>0.23</b>        | 5.4E-4 |
| PM <sub>2.5</sub>                                                   | <b>0.66</b>      | 2.1E-6  | <b>0.49</b>      | 2.8E-6 | 0.06                | 0.54   | <b>0.30</b>        | 5.6E-6 | <b>-0.20</b>           | 0.042 | 0.16                | 0.22 | -0.088             | 0.26   |
| RH                                                                  | <b>0.63</b>      | 7E-6    | 0.04             | 0.74   | <b>-0.38</b>        | 9.4E-5 | 0.05               | 0.46   | <b>-0.23</b>           | 0.021 | 0.11                | 0.39 | -0.067             | 0.39   |
| NO <sub>3</sub> <sup>-</sup>                                        | <b>0.39</b>      | 0.011   | <b>0.48</b>      | 4.5E-6 | -0.17               | 0.082  | <b>0.21</b>        | 0.0012 | -0.16                  | 0.10  | 0.16                | 0.21 | -0.083             | 0.29   |
| OC                                                                  | <b>0.81</b>      | 1.1E-10 | <b>0.44</b>      | 2.9E-5 | 0.13                | 0.19   | <b>0.28</b>        | 2.4E-5 | -0.17                  | 0.095 | 0.17                | 0.19 | 0.017              | 0.83   |
| JNO <sub>2</sub> *RH                                                | <b>0.71</b>      | 0.0042  | 0.15             | 0.45   | <b>-0.36</b>        | 8.0E-4 | 0.039              | 0.31   | -0.024                 | 0.69  | -0.025              | 0.78 | <b>0.20</b>        | 0.0058 |
| NO <sub>2</sub> *PM <sub>2.5</sub>                                  | <b>0.57</b>      | 8.3E-5  | <b>0.50</b>      | 2.0E-6 | -0.1                | 0.32   | <b>0.28</b>        | 2.4E-5 | -0.19                  | 0.056 | 0.034               | 0.79 | <b>-0.17</b>       | 0.028  |
| NO <sub>2</sub> *OC                                                 | <b>0.57</b>      | 9.2E-5  | <b>0.45</b>      | 2.3E-5 | -0.058              | 0.55   | <b>0.26</b>        | 5.8E-5 | -0.15                  | 0.15  | 0.062               | 0.63 | <b>-0.17</b>       | 0.026  |
| NO <sub>2</sub> *EC                                                 | 0.22             | 0.16    | <b>0.32</b>      | 0.0035 | -0.12               | 0.22   | <b>0.15</b>        | 0.022  | -0.14                  | 0.16  | 0.11                | 0.40 | <b>-0.16</b>       | 0.043  |
| NO <sub>2</sub> *JNO <sub>2</sub> *PM <sub>2.5</sub>                | <b>0.62</b>      | 1.0E-5  | <b>0.32</b>      | 0.0038 | -0.12               | 0.24   | <b>0.24</b>        | 3.0E-4 | -0.11                  | 0.27  | -0.06               | 0.65 | -0.11              | 0.16   |
| NO <sub>2</sub> *JNO <sub>2</sub> *RH*PM <sub>2.5</sub>             | <b>0.60</b>      | 3.2E-5  | <b>0.33</b>      | 0.0022 | <b>-0.18</b>        | 0.068  | <b>0.22</b>        | 8.9E-4 | -0.12                  | 0.22  | -0.049              | 0.70 | -0.092             | 0.24   |
| NO <sub>2</sub> *JNO <sub>2</sub> *OC                               | <b>0.58</b>      | 5.9E-5  | <b>0.21</b>      | 0.059  | -0.12               | 0.25   | <b>0.19</b>        | 0.0037 | -0.031                 | 0.76  | -0.1                | 0.44 | -0.013             | 0.87   |
| NO <sub>2</sub> *JNO <sub>2</sub> *RH*OC                            | <b>0.62</b>      | 1.4E-5  | <b>0.26</b>      | 0.021  | <b>-0.18</b>        | 0.063  | <b>0.20</b>        | 0.0030 | -0.07                  | 0.47  | -0.04               | 0.74 | 0.008              | 0.92   |
| NO <sub>2</sub> *JNO <sub>2</sub> *EC                               | <b>0.36</b>      | 0.019   | <b>0.22</b>      | 0.044  | -0.15               | 0.14   | 0.095              | 0.16   | -0.11                  | 0.29  | -0.1                | 0.45 | -0.12              | 0.13   |
| NO <sub>2</sub> *JNO <sub>2</sub> *RH*EC                            | <b>0.41</b>      | 0.007   | <b>0.22</b>      | 0.047  | -0.19               | 0.061  | 0.088              | 0.19   | -0.13                  | 0.20  | -0.07               | 0.58 | -0.10              | 0.19   |
| JNO <sub>2</sub> *NO <sub>3</sub> <sup>-</sup>                      | <b>0.48</b>      | 0.001   | <b>0.29</b>      | 0.0083 | <b>-0.20</b>        | 0.044  | <b>0.18</b>        | 0.0082 | -0.09                  | 0.37  | 0.032               | 0.80 | 0.005              | 0.95   |
| JNO <sub>2</sub> *RH*NO <sub>3</sub> <sup>-</sup>                   | <b>0.50</b>      | 7.2E-4  | <b>0.30</b>      | 0.0058 | <b>-0.24</b>        | 0.015  | <b>0.16</b>        | 0.017  | -0.10                  | 0.31  | 0.006               | 0.96 | 0.047              | 0.55   |
| JNO <sub>2</sub> *NO <sub>3</sub> *SO <sub>4</sub> <sup>2-</sup>    | 0.26             | 0.1     | <b>0.32</b>      | 0.0031 | -0.14               | 0.15   | 0.10               | 0.12   | -0.16                  | 0.12  | 0.13                | 0.30 | -0.023             | 0.77   |
| JNO <sub>2</sub> *RH*NO <sub>3</sub> *SO <sub>4</sub> <sup>2-</sup> | 0.23             | 0.14    | <b>0.33</b>      | 0.0028 | -0.17               | 0.08   | 0.092              | 0.17   | -0.15                  | 0.12  | 0.16                | 0.22 | 0.0069             | 0.93   |
| JNO <sub>2</sub> *NO <sub>3</sub> *Cl <sup>-</sup>                  | 0.16             | 0.31    | <b>0.46</b>      | 1.3E-5 | <b>-0.26</b>        | 0.0087 | <b>0.17</b>        | 0.011  | -0.12                  | 0.22  | 0.093               | 0.46 | -0.074             | 0.35   |
| JNO <sub>2</sub> *RH*NO <sub>3</sub> *Cl <sup>-</sup>               | 0.14             | 0.37    | <b>0.44</b>      | 4.1E-5 | <b>-0.27</b>        | 0.0053 | -0.029             | 0.67   | -0.11                  | 0.28  | 0.075               | 0.56 | -0.058             | 0.46   |
| JNO <sub>2</sub> *NO <sub>3</sub> *OC                               | <b>0.55</b>      | 1.5E-4  | <b>0.26</b>      | 0.019  | -0.05               | 0.58   | <b>0.19</b>        | 0.0039 | -0.14                  | 0.17  | 0.045               | 0.72 | -0.05              | 0.52   |
| JNO <sub>2</sub> *RH*NO <sub>3</sub> *OC                            | <b>0.52</b>      | 4.3E-4  | <b>0.29</b>      | 0.009  | -0.23               | 0.019  | <b>0.18</b>        | 0.0064 | -0.11                  | 0.27  | 0.027               | 0.83 | -0.020             | 0.80   |

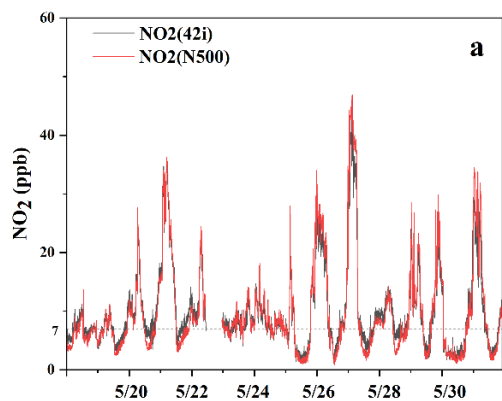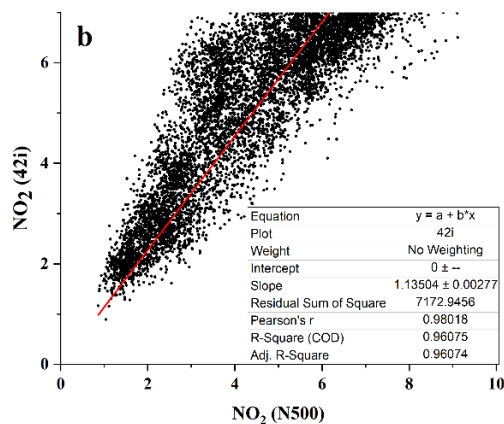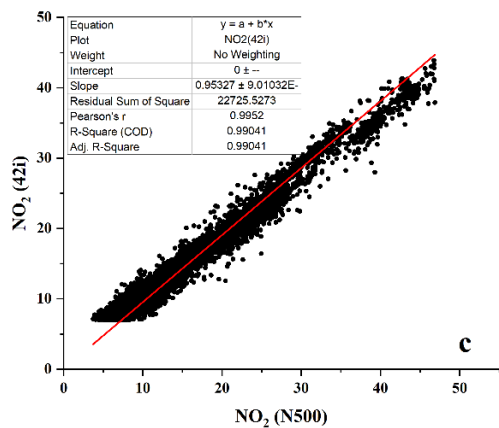

45 **Figure S1.** (a) The comparison plot of NO<sub>2</sub> data during the observation period (2024.0519-2024.0531, the Teledyne API Model N500 CAPS NO<sub>x</sub> analyzer and the Thermo Scientific 42i analyzer); (b) Comparison of the corresponding data between the two devices when the 42i device measures NO<sub>2</sub> concentrations below 7 ppb; (c) Comparison of corresponding data between the two devices when 42i device measures NO<sub>2</sub> concentrations above 7 ppb.



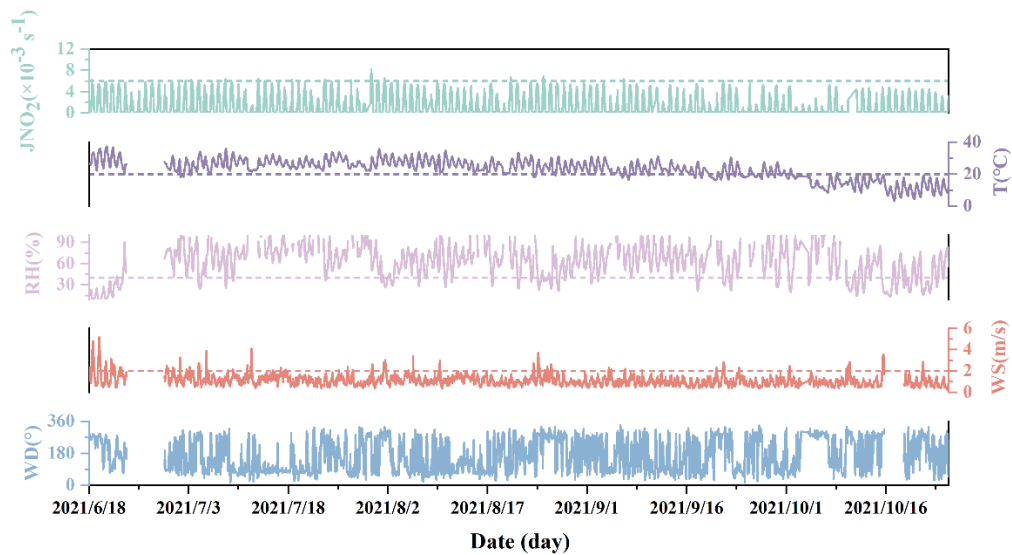

Figure S2. Temporal trends of hourly average RH, T, WD (wind direction), WS (wind speed), and JNO<sub>2</sub> during the measurement.

50

55

60

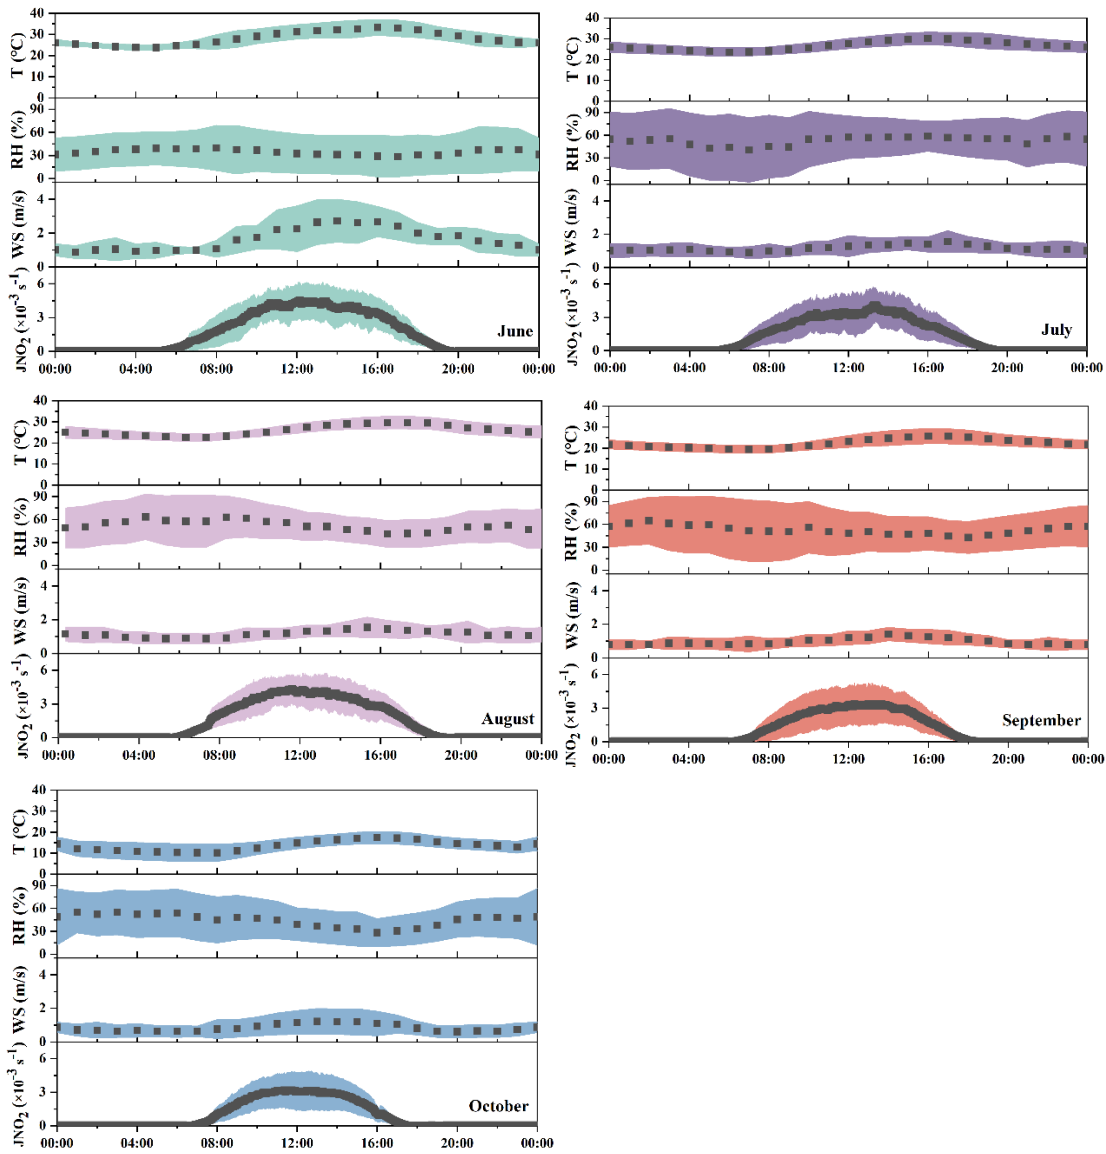

Figure S3. Daily averaged variation of several meteorology data during the observation.

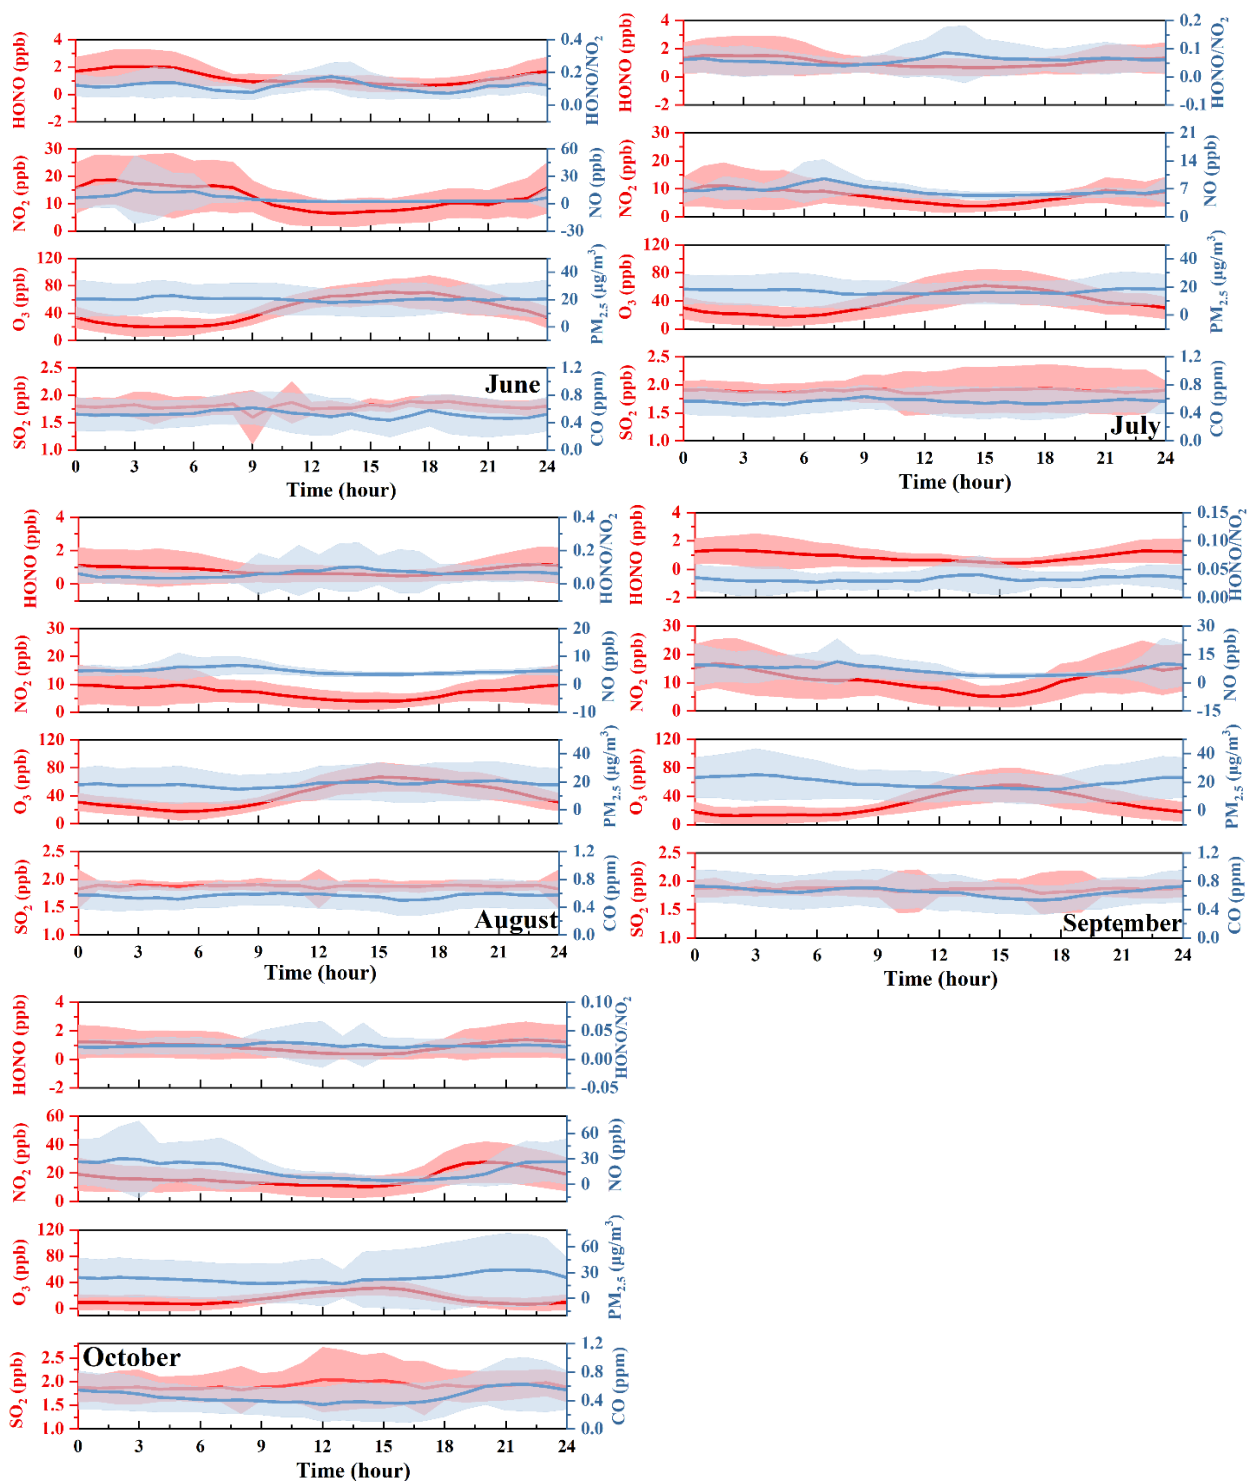

Figure S4. Daily averaged values of several parameters during the observation. The shaded areas represent the standard deviation of the corresponding pollutant concentration.

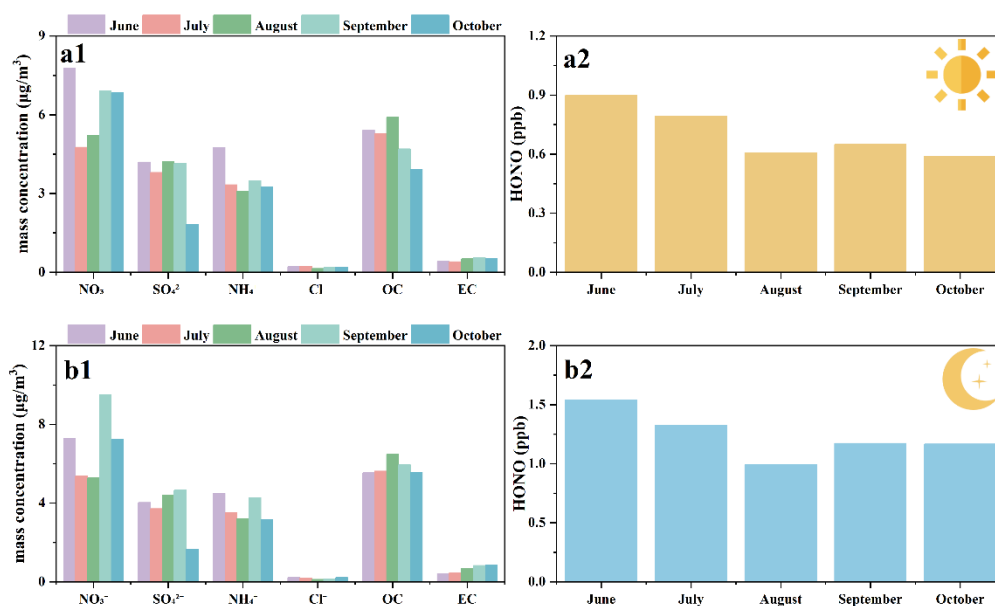

**Figure S5.** Distributions of  $\text{NO}_3^-$ ,  $\text{SO}_4^{2-}$ ,  $\text{NH}_4^+$ ,  $\text{Cl}^-$ ,  $\text{OC}$ ,  $\text{EC}$ , and HONO mean concentrations under different months. The upper panel was the daytime average value (7:00-18:00), and the bottom panel was the nighttime average value (19:00-6:00)

## 80 References

- Atkinson, R., Baulch, D. L., Cox, R. A., Hampson, J. R. F., Kerr, J. A., Rossi, M. J., and Troe, J.: Evaluated kinetic and photochemical data for atmospheric chemistry: Supplement VI. IUPAC subcommittee on gas kinetic data evaluation for atmospheric chemistry, *J. Phys. Chem. Ref. Data*, 26, 1329–1499, doi: 10.1063/1.556010, 1997.
- Gu, R., Shen, H., Xue, L., Wang, T., Gao, J., Li, H., Liang, Y., Xia, M., Yu, C., Liu, Y., and Wang, W.: Investigating the sources of atmospheric nitrous acid (HONO) in the megacity of Beijing, China, *Sci. Total Environ.*, 812, 152270, doi: 10.1016/j.scitotenv.2021.152270, 2022.
- Hendrick, F., Müller, J. F., Clémer, K., Wang, P., De Mazière, M., Fayt, C., Gielen, C., Hermans, C., Ma, J. Z., Pinardi, G., Stavrou, T., Vlemmix, T., and Van Roozendaal, M.: Four years of ground-based MAX-DOAS observations of HONO and  $\text{NO}_2$  in the Beijing area, *Atmos. Chem. Phys.*, 14, 765–781, doi: 10.5194/acp-14-765-2014, 2014.
- Hou, S., Tong, S., Ge, M., and An, J.: Comparison of atmospheric nitrous acid during severe haze and clean periods in Beijing, China, *Atmos. Environ.*, 124, 199–206, doi: 10.1016/j.atmosenv.2015.06.023, 2016.
- Hu, M., Zhou, F., Shao, K., Zhang, Y., Tang, X., and Slanina, J.: Diurnal variations of aerosol chemical compositions and related gaseous pollutants in Beijing and Guangzhou, *J. Environ. Sci. Health A, Part A*, 37, 479–488, doi: 10.1081/ese-120003229, 2002.
- Jia, C., Tong, S., Zhang, X., Li, F., Zhang, W., Li, W., Wang, Z., Zhang, G., Tang, G., Liu, Z., and Ge, M.: Atmospheric oxidizing capacity in autumn Beijing: Analysis of the  $\text{O}_3$  and  $\text{PM}_{2.5}$  episodes based on observation-based model, *J. Environ. Sci. (China)*, 124, 557–569, doi: 10.1016/j.jes.2021.11.020, 2023.
- Li, Y., Wang, X., Wu, Z., Li, L., Wang, C., Li, H., Zhang, X., Zhang, Y., Li, J., Gao, R., Xue, L., Mellouki, A., Ren, Y., and Zhang, Q.: Atmospheric nitrous acid (HONO) in an alternate process of haze pollution and ozone pollution in urban Beijing in summertime: Variations, sources and contribution to atmospheric photochemistry, *Atmos. Res.*, 260, 105689, doi: 10.1016/j.atmosres.2021.105689, 2021.
- Lian, C., Wang, W., Chen, Y., Zhang, Y., Zhang, J., Liu, Y., Fan, X., Li, C., Zhan, J., Lin, Z., Hua, C., Zhang, W., Liu, M., Li,

J., Wang, X., An, J., and Ge, M.: Long-term winter observation of nitrous acid in the urban area of Beijing, *J. Environ. Sci. (China)*, 114, 334–342, doi: 10.1016/j.jes.2021.09.010, 2022.

105 Lin, D., Tong, S., Zhang, W., Li, W., Li, F., Jia, C., Zhang, G., Chen, M., Zhang, X., Wang, Z., Ge, M., and He, X.: Formation mechanisms of nitrous acid (HONO) during the haze and non-haze periods in Beijing, China, *J. Environ. Sci. (China)*, 114, 343–353, doi: 10.1016/j.jes.2021.09.013, 2022.

Liu, J., Liu, Z., Ma, Z., Yang, S., Yao, D., Zhao, S., Hu, B., Tang, G., Sun, J., Cheng, M., Xu, Z., and Wang, Y.: Detailed budget analysis of HONO in Beijing, China: Implication on atmosphere oxidation capacity in polluted megacity, *Atmos. Environ.*, 244, 117957, doi: 10.1016/j.atmosenv.2020.117957, 2021.

110 Seinfeld, J. H., and Pandis, S. N.: *Atmospheric chemistry and physics: From air pollution to climate change*, 2nd Edition, New York: John Wiley & Sons., 2006.

Spataro, F., Ianniello, A., Esposito, G., Allegrini, I., Zhu, T., and Hu, M.: Occurrence of atmospheric nitrous acid in the urban area of Beijing (China), *Sci. Total Environ.*, 447, 210–224, doi: 10.1016/j.scitotenv.2012.12.065, 2013.

115 Su, J., Zhao, P., Ding, J., Du, X., and Dou, Y.: Insights into measurements of water-soluble ions in PM<sub>2.5</sub> and their gaseous precursors in Beijing, *J. Environ. Sci. (China)*, 102, 123–137, doi: 10.1016/j.jes.2020.08.031, 2021.

Tong, S., Hou, S., Zhang, Y., Chu, B., Liu, Y., He, H., Zhao, P., and Ge, M.: Comparisons of measured nitrous acid (HONO) concentrations in a pollution period at urban and suburban Beijing, in autumn of 2014, *Sci. China Chem.*, 58, 1393–1402, doi: 10.1007/s11426-015-5454-2, 2015.

120 Tong, S., Hou, S., Zhang, Y., Chu, B., Liu, Y., He, H., Zhao, P., and Ge, M.: Exploring the nitrous acid (HONO) formation mechanism in winter Beijing: direct emissions and heterogeneous production in urban and suburban areas, *Faraday Discuss.*, 189, 213–230, doi: 10.1039/c5fd00163c, 2016.

Wang, J., Zhang, X., Guo, J., Wang, Z., and Zhang, M.: Observation of nitrous acid (HONO) in Beijing, China: Seasonal variation, nocturnal formation and daytime budget, *Sci. Total Environ.*, 587–588, 350–359, doi: 10.1016/j.scitotenv.2017.02.159, 2017.

125 Wu, Z., Hu, M., Shao, K., and Slanina, J.: Acidic gases, NH<sub>3</sub> and secondary inorganic ions in PM<sub>10</sub> during summertime in Beijing, China and their relation to air mass history, *Chemosphere*, 76, 1028–1035, doi: 10.1016/j.chemosphere.2009.04.066, 2009.

130 Xuan, H., Zhao, Y., Ma, Q., Chen, T., Liu, J., Wang, Y., Liu, C., Wang, Y., Liu, Y., Mu, Y., and He, H.: Formation mechanisms and atmospheric implications of summertime nitrous acid (HONO) during clean, ozone pollution and double high-level PM<sub>2.5</sub> and O<sub>3</sub> pollution periods in Beijing, *Sci. Total Environ.*, 857, 159538, doi: 10.1016/j.scitotenv.2022.159538, 2023.

Zhang, W., Tong, S., Ge, M., An, J., Shi, Z., Hou, S., Xia, K., Qu, Y., Zhang, H., Chu, B., Sun, Y., and He, H.: Variations and sources of nitrous acid (HONO) during a severe pollution episode in Beijing in winter 2016, *Sci. Total Environ.*, 648, 253–262, doi: 10.1016/j.scitotenv.2018.08.133, 2019.

135 Zhang, W., Tong, S., Jia, C., Ge, M., Ji, D., Zhang, C., Liu, P., Zhao, X., Mu, Y., Hu, B., Wang, L., Tang, G., Li, X., Li, W., and Wang, Z.: Effect of different combustion processes on atmospheric nitrous acid formation mechanisms: A winter comparative observation in urban, suburban and rural areas of the North China Plain, *Environ. Sci. Technol.*, 56, 4828–4837, doi: 10.1021/acs.est.1c07784, 2022a.

140 Zhang, W., Tong, S., Lin, D., Li, F., Zhang, X., Wang, L., Ji, D., Tang, G., Liu, Z., Hu, B., and Ge, M.: Atmospheric chemistry of nitrous acid and its effects on hydroxyl radical and ozone at the urban area of Beijing in early spring 2021, *Environ. Pollut.*, 316, 120710, doi: 10.1016/j.envpol.2022.120710, 2023a.

Zhang, X., Tong, S., Jia, C., Zhang, W., Li, J., Wang, W., Sun, Y., Wang, X., Wang, L., Ji, D., Wang, L., Zhao, P., Tang, G., Xin, J., Li, A., and Ge, M.: The levels and sources of nitrous acid (HONO) in winter of Beijing and Sanmenxia, *J. Geophys. Res. Atmos.*, 127, e2021JD036278, doi: 10.1029/2021jd036278, 2022b.

145 Zhang, X., Tong, S., Jia, C., Zhang, W., Wang, Z., Tang, G., Hu, B., Liu, Z., Wang, L., Zhao, P., Pan, Y., and Ge, M.: Elucidating HONO formation mechanism and its essential contribution to OH during haze events, *NPJ Clim. Atmos. Sci.*, 6, doi: 10.1038/s41612-023-00371-w, 2023b.
